# Supplementary material for: Genome-wide analysis of the transcriptional response to drought stress in root and leaf of common bean
Source: PubMed Central journal article supplement (PMC7307723; doi:10.1590/1678-4685-gmb-2018-0259), 2020-03-16
Supplement: 1415-4757-GMB-43-1-e20180259-s2.pdf [file 1415-4757-GMB-43-1-e20180259-s2.pdf]

## Supplementary Material to: “Genome-wide analysis of the transcriptional response to drought stress in root and leaf of common bean”

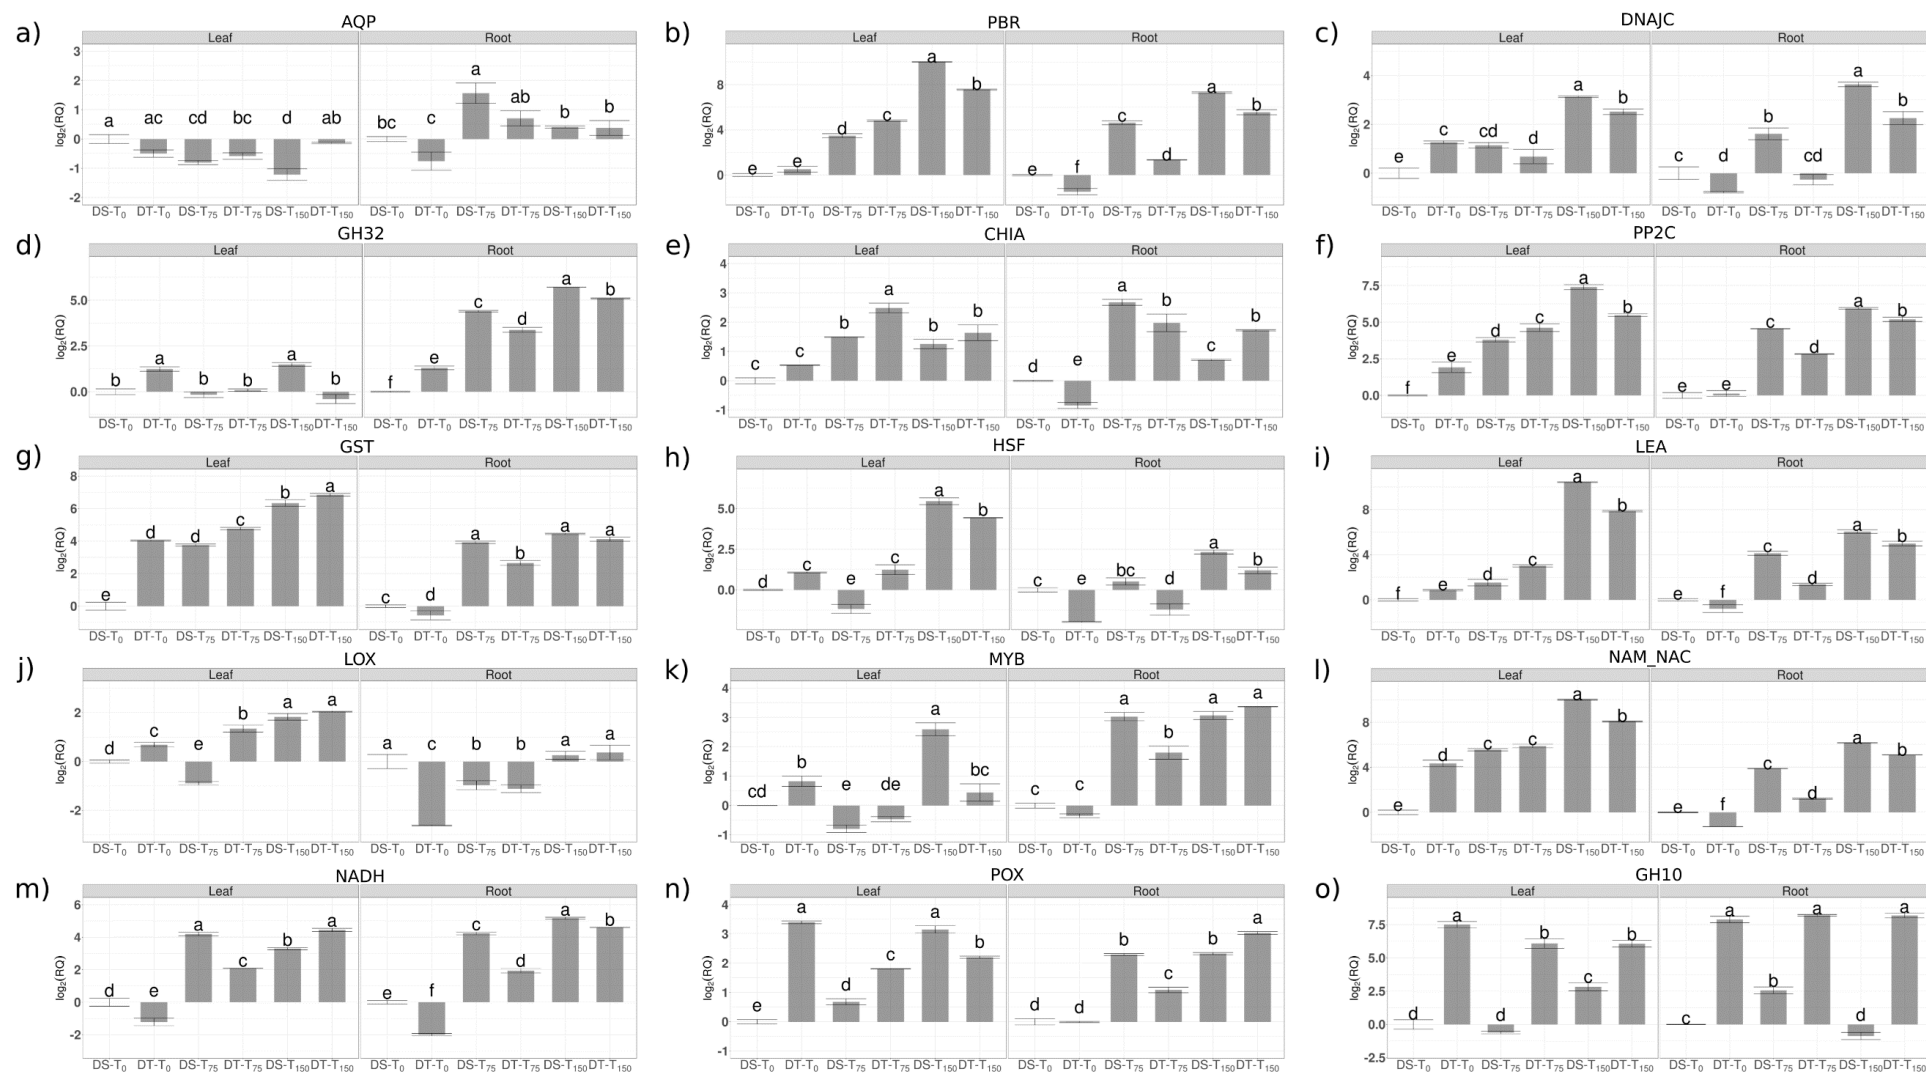

Figure S2 - Expression profile for the 15 genes selected for qPCR validation.
