# Supplementary material for: Genome-wide analysis of the transcriptional response to drought stress in root and leaf of common bean
Source: PubMed Central journal article supplement (PMC7307723; doi:10.1590/1678-4685-gmb-2018-0259), 2020-03-16
Supplement: 1415-4757-GMB-43-1-e20180259-s10.pdf [file 1415-4757-GMB-43-1-e20180259-s10.pdf]

## Supplementary Material to: “Genome-wide analysis of the transcriptional response to drought stress in root and leaf of common”

**Table S8.** Number of variants identified after each Base Quality Score Recalibration (BQSR) step.

| Variants \ Haplotype caller step |            | Without BQSR   | First BQSR     | Second BQSR    |
|----------------------------------|------------|----------------|----------------|----------------|
| BAT 477                          | SNPs       | 119,371        | 119,573        | 119,572        |
|                                  | Insertions | 7,141          | 6,596          | 6,591          |
|                                  | Deletions  | 7,560          | 7,260          | 7,261          |
| Pérola                           | SNPs       | 96,061         | 96,198         | 96,192         |
|                                  | Insertions | 6,180          | 5,643          | 5,638          |
|                                  | Deletions  | 6,697          | 6,411          | 6,412          |
| All                              | SNPs       | 134,870        | 135,175        | 135,167        |
|                                  | Insertions | 8,194          | 7,656          | 7,652          |
|                                  | Deletions  | 8,749          | 8,462          | 8,464          |
| <b>Total</b>                     |            | <b>151,813</b> | <b>151,293</b> | <b>151,283</b> |
